# Supplementary material for: Chemical Modifications Influence the Number of siRNA Molecules Adsorbed on Gold Nanoparticles and the Efficiency of Downregulation of a Target Protein
Source: MDPI journal article supplement (doi:10.3390/nano12244450), 2022-12-14

Supplementary Materials

# Chemical Modifications Influence the Number of siRNA Molecules Adsorbed on Gold Nanoparticles and the Efficiency of Downregulation of a Target Protein

Anna V. Epanchintseva, Julia E. Poletaeva, Anton S. Dome, Ilya S. Dovydenko \*, Inna A. Pyshnaya and Elena I. Ryabchikova \*

Institute of Chemical Biology and Fundamental Medicine SB RAS, Novosibirsk 630090, Russia

\* Correspondence: dovydenko\_il@niboch.nsc.ru (I.S.D.); lenryab@yandex.ru (E.I.R.);

Tel.: +7-(383)-363-5163 (I.S.D. & E.I.R.)

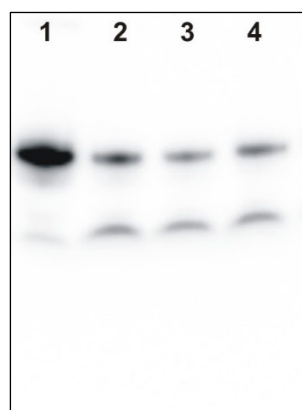

**Figure S1.** Assessment of MLNC resistance to nucleases by polyacrylamide gel electrophoresis. 1-control siRNA sample, 2-4 – siRNA samples after 4 h incubation in 10% FBS, experiment was carried out in triplicate.

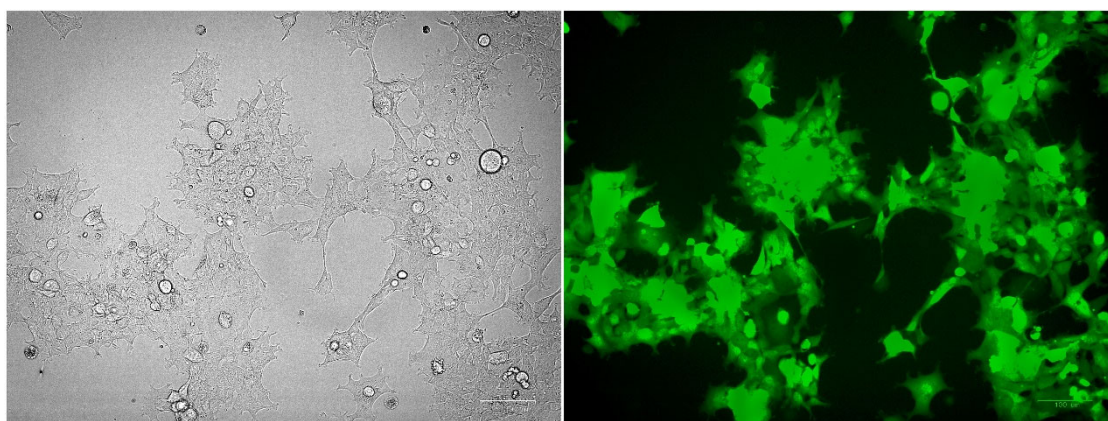

**Figure S2.** EGFP-expressing HEK293FT cells. The image of the cells on well surface in phase-contrast mode (left) and in ultraviolet light (right). The intense green fluorescence of EGFP protein in the cells is observed.

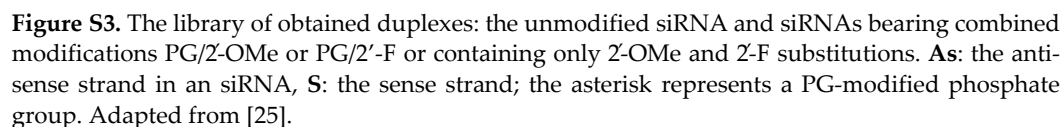

Supplement: s1 [file s1]
